# Supplementary material for: Optimization Method of the Solvothermal Parameters Using Box–Behnken Experimental Design—The Case Study of ZnO Structural and Catalytic Tailoring
Source: MDPI journal article supplement (doi:10.3390/nano11051334), 2021-05-19
Supplement: s1 [file s1]

## Supplementary Materials

# Optimization Method of the Solvothermal Parameters Using Box–Behnken Experimental Design—The Case Study of ZnO Structural and Catalytic Tailoring

Zoltán Kovács, Csanád Molnár, Urška Lavrenčič Štangar, Vasile–Mircea Cristea, Zsolt Pap, Klara Hernadi and Lucian Baia

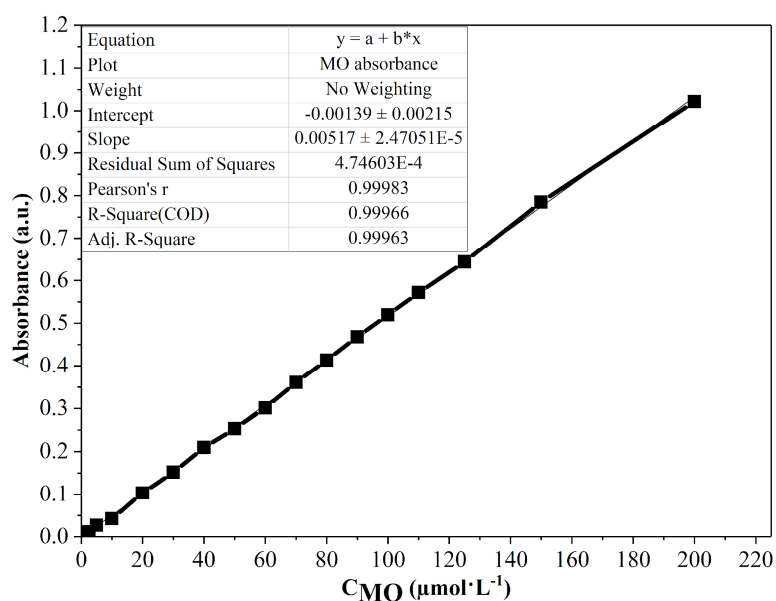

**Figure S1.** The calibration curve of methyl orange (MO) absorbance at 464 nm at different concentrations (1–200  $\mu\text{M}$ ).

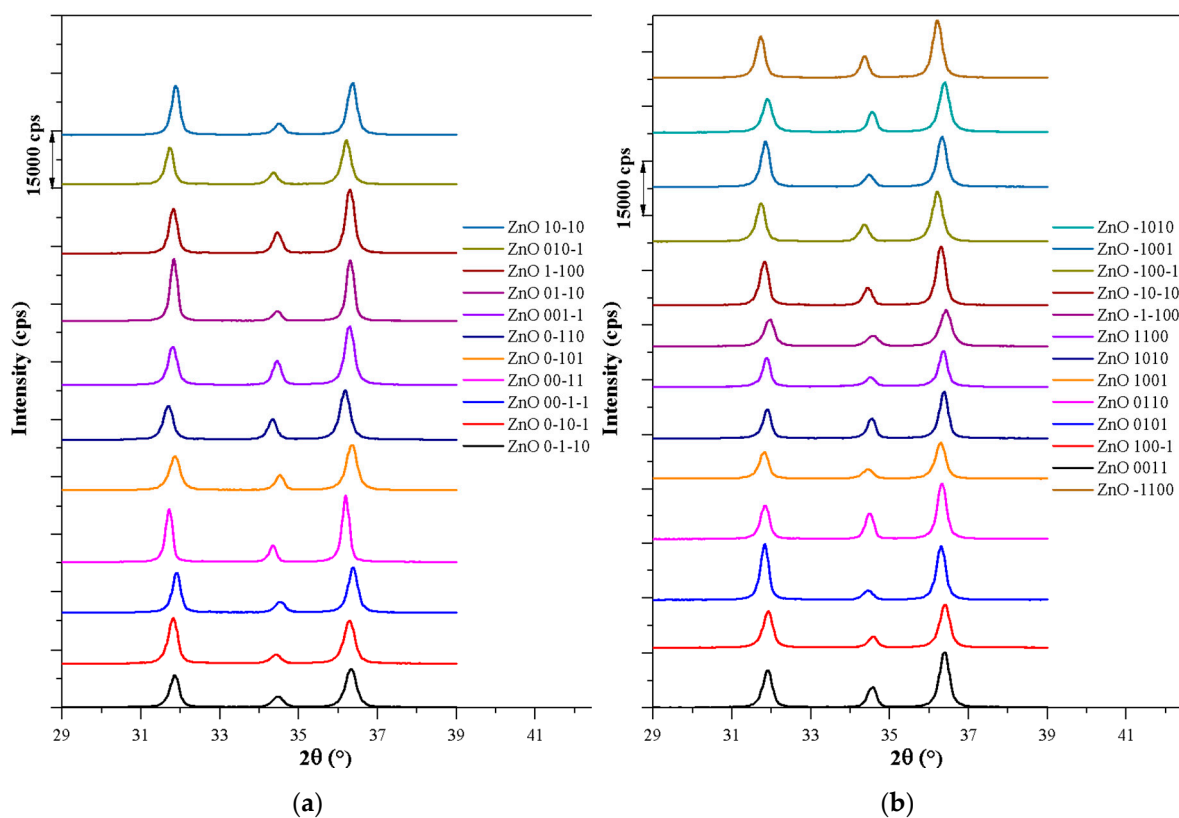

**Figure S2.** The X-ray diffractograms of all the synthesized samples according to the Box-Behnken Design (BBD) model.

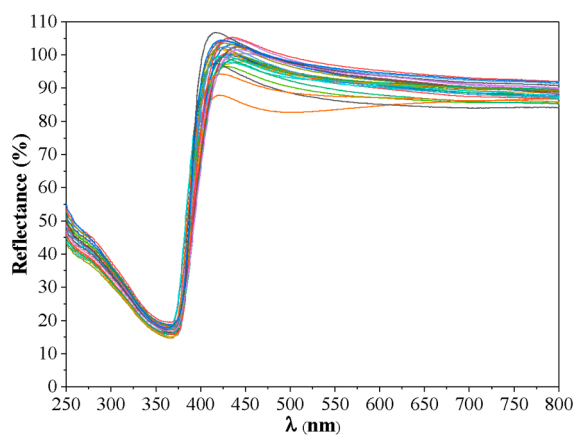

**Figure S3.** The histograms of residuals of the fitted full quadratic model for photodegradation efficiency (PDE) and  $r_{(002)/(100)}$ .

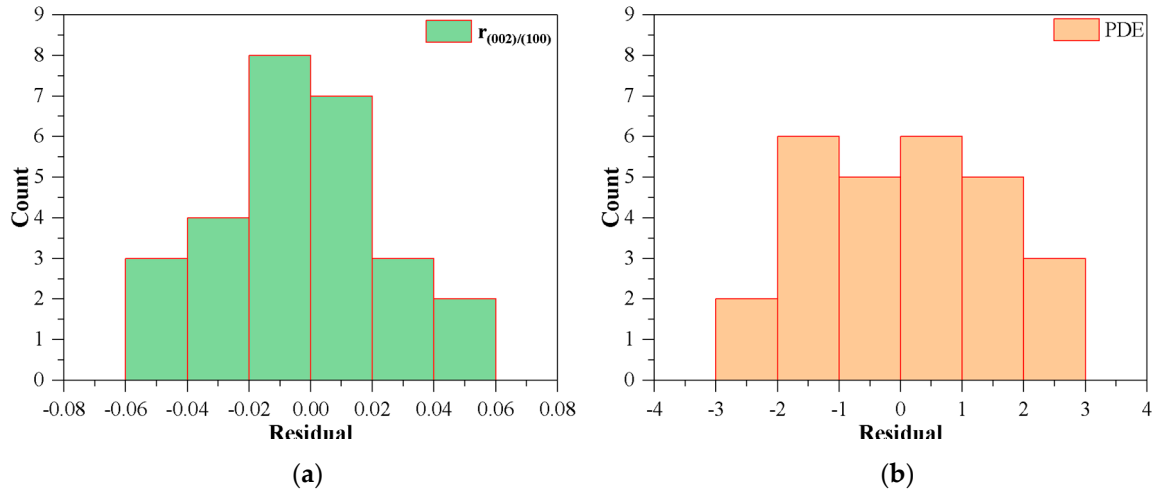

**Figure S4.** The histograms of residuals of the fitted full quadratic model: (a) for PDE; (b) for  $r_{(002)/(100)}$ .

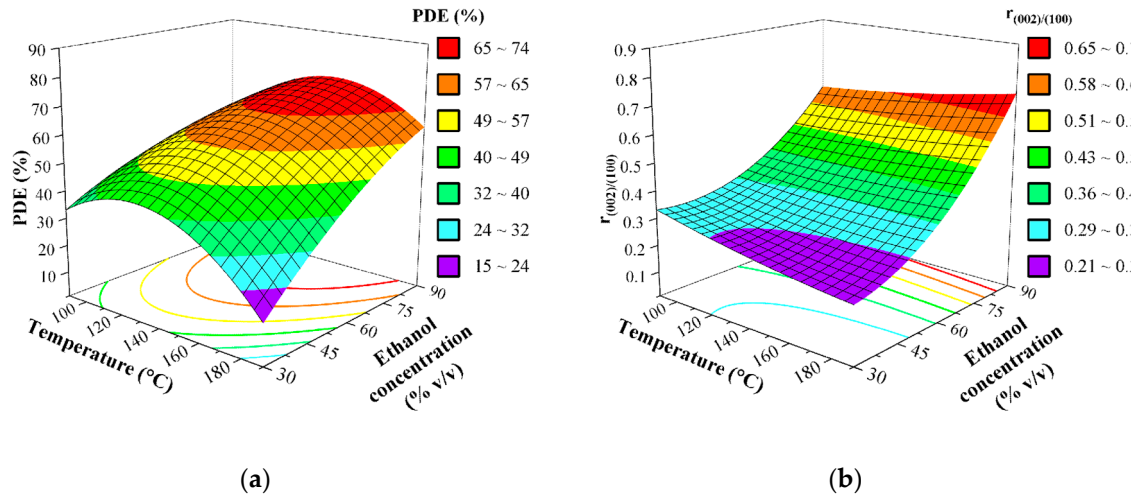

**Figure S5.** Effect of interaction between temperature (X<sub>1</sub>) and ethanol concentration (X<sub>3</sub>): (a) on the PDE; (b)  $r_{(002)/(100)}$  On the of ZnO as 3D response surface.

**Table S1.** ANOVA results for quadratic model of ZnO using Box–Behnken design.

| Coded Coefficients              |         |         |         |         |      |              |         |         |         |      |
|---------------------------------|---------|---------|---------|---------|------|--------------|---------|---------|---------|------|
| Term                            | PDE     |         |         |         |      | I(002)/(100) |         |         |         |      |
|                                 | Coef    | SE Coef | T-value | P-value | VIF  | Coef         | SE Coef | T-value | p-value | VIF  |
| Costant                         | 62.27   | 1.24    | 50.05   | 0       |      | 0.361        | 0.023   | 16.00   | 0.000   |      |
| X <sub>1</sub>                  | -2.142  | 0.622   | -3.44   | 0.005   | 1    | -0.007       | 0.011   | -0.61   | 0.551   | 1    |
| X <sub>2</sub>                  | -4.425  | 0.622   | -7.11   | 0       | 1    | -0.061       | 0.011   | -5.38   | 0.000   | 1    |
| X <sub>3</sub>                  | 15.925  | 0.622   | 25.6    | 0       | 1    | 0.205        | 0.011   | 18.21   | 0.000   | 1    |
| X <sub>4</sub>                  | -3.025  | 0.622   | -4.86   | 0       | 1    | -0.023       | 0.011   | -2.04   | 0.064   | 1    |
| X <sub>1</sub> <sup>2</sup>     | -17.046 | 0.933   | -18.27  | 0       | 1.25 | 0.012        | 0.017   | 0.72    | 0.484   | 1.25 |
| X <sub>2</sub> <sup>2</sup>     | -5.696  | 0.933   | -6.1    | 0       | 1.25 | 0.041        | 0.017   | 2.45    | 0.031   | 1.25 |
| X <sub>3</sub> <sup>2</sup>     | -5.021  | 0.933   | -5.38   | 0       | 1.25 | 0.106        | 0.017   | 6.24    | 0.000   | 1.25 |
| X <sub>4</sub> <sup>2</sup>     | -9.521  | 0.933   | -10.2   | 0       | 1.25 | -0.034       | 0.017   | -2.02   | 0.066   | 1.25 |
| X <sub>1</sub> × X <sub>2</sub> | -3.42   | 1.08    | -3.18   | 0.008   | 1    | -0.050       | 0.020   | -2.56   | 0.025   | 1    |
| X <sub>1</sub> × X <sub>3</sub> | 6.62    | 1.08    | 6.15    | 0       | 1    | 0.053        | 0.020   | 2.73    | 0.018   | 1    |
| X <sub>1</sub> × X <sub>4</sub> | 2.73    | 1.08    | 2.53    | 0.026   | 1    | 0.060        | 0.020   | 3.07    | 0.010   | 1    |
| X <sub>2</sub> × X <sub>3</sub> | -13.43  | 1.08    | -12.46  | 0       | 1    | 0.003        | 0.020   | 0.14    | 0.890   | 1    |
| X <sub>2</sub> × X <sub>4</sub> | -3.43   | 1.08    | -3.18   | 0.008   | 1    | -0.002       | 0.020   | -0.12   | 0.910   | 1    |
| X <sub>3</sub> × X <sub>4</sub> | 7.17    | 1.08    | 6.66    | 0       | 1    | -0.046       | 0.020   | -2.37   | 0.035   | 1    |

**Table S2.** Experimental runs of Box–Behnken design with the comparison between predicted and experimental photocatalytic degradation efficiency.

| Run number | Factors value  |                |                |                | PDE              |               |
|------------|----------------|----------------|----------------|----------------|------------------|---------------|
|            | X <sub>1</sub> | X <sub>2</sub> | X <sub>3</sub> | X <sub>4</sub> | Experimental [%] | Predicted [%] |
|            | °C             | M              | % <i>v/v</i>   | h              |                  |               |
| 1          | 90             | 0.068          | 60             | 8              | 42.2             | 42.64         |
| 2          | 90             | 0.204          | 60             | 8              | 39.3             | 40.64         |
| 3          | 90             | 0.136          | 30             | 8              | 31.3             | 33.00         |
| 4          | 90             | 0.136          | 90             | 8              | 52.8             | 51.62         |
| 5          | 90             | 0.136          | 60             | 4              | 45.5             | 43.57         |
| 6          | 90             | 0.136          | 60             | 12             | 32.6             | 32.05         |
| 7          | 190            | 0.068          | 60             | 8              | 44.9             | 45.18         |
| 8          | 190            | 0.204          | 60             | 8              | 28.3             | 29.49         |
| 9          | 190            | 0.136          | 30             | 8              | 13.1             | 15.45         |
| 10         | 190            | 0.136          | 90             | 8              | 61.1             | 60.57         |
| 11         | 190            | 0.136          | 60             | 4              | 36.3             | 33.82         |
| 12         | 190            | 0.136          | 60             | 12             | 34.3             | 33.20         |
| 13         | 140            | 0.068          | 30             | 8              | 28.9             | 26.58         |
| 14         | 140            | 0.068          | 90             | 8              | 86.7             | 85.29         |
| 15         | 140            | 0.068          | 60             | 4              | 48.3             | 51.05         |
| 16         | 140            | 0.068          | 60             | 12             | 51.8             | 51.82         |
| 17         | 140            | 0.204          | 30             | 8              | 46.2             | 44.58         |
| 18         | 140            | 0.204          | 90             | 8              | 50.3             | 49.59         |
| 19         | 140            | 0.204          | 60             | 4              | 47.9             | 49.05         |
| 20         | 140            | 0.204          | 60             | 12             | 37.7             | 36.12         |
| 21         | 140            | 0.136          | 30             | 4              | 42.8             | 41.96         |
| 22         | 140            | 0.136          | 30             | 12             | 21.1             | 21.54         |
| 23         | 140            | 0.136          | 90             | 12             | 65.3             | 67.75         |
| 24         | 140            | 0.136          | 90             | 4              | 58.3             | 59.48         |
| 25         | 140            | 0.136          | 60             | 8              | 61.8             | 62.23         |
| 26         | 140            | 0.136          | 60             | 8              | 62.1             | 62.23         |
| 27         | 140            | 0.136          | 60             | 8              | 62.9             | 62.23         |

**Table S3.** Experimental runs of Box–Behnken design with the comparison between predicted and experimental ratio of intensities of diffraction peaks (0 0 2) and (1 0 0).

| Run number | Factors value  |                |                |                | PDE              |               |
|------------|----------------|----------------|----------------|----------------|------------------|---------------|
|            | X <sub>1</sub> | X <sub>2</sub> | X <sub>3</sub> | X <sub>4</sub> | Experimental [%] | Predicted [%] |
|            | °C             | M              | % <i>v/v</i>   | h              |                  |               |
| 1          | 90             | 0.068          | 60             | 8              | 0.406            | 0.429         |
| 2          | 90             | 0.204          | 60             | 8              | 0.444            | 0.407         |
| 3          | 90             | 0.136          | 30             | 8              | 0.351            | 0.332         |
| 4          | 90             | 0.136          | 90             | 8              | 0.619            | 0.632         |
| 5          | 90             | 0.136          | 60             | 4              | 0.429            | 0.426         |
| 6          | 90             | 0.136          | 60             | 12             | 0.255            | 0.259         |
| 7          | 190            | 0.068          | 60             | 8              | 0.501            | 0.515         |
| 8          | 190            | 0.204          | 60             | 8              | 0.339            | 0.293         |
| 9          | 190            | 0.136          | 30             | 8              | 0.225            | 0.213         |
| 10         | 190            | 0.136          | 90             | 8              | 0.706            | 0.723         |
| 11         | 190            | 0.136          | 60             | 4              | 0.292            | 0.292         |
| 12         | 190            | 0.136          | 60             | 12             | 0.358            | 0.365         |
| 13         | 140            | 0.068          | 30             | 8              | 0.328            | 0.365         |
| 14         | 140            | 0.068          | 90             | 8              | 0.802            | 0.764         |
| 15         | 140            | 0.068          | 60             | 4              | 0.492            | 0.446         |
| 16         | 140            | 0.068          | 60             | 12             | 0.414            | 0.404         |
| 17         | 140            | 0.204          | 30             | 8              | 0.197            | 0.238         |
| 18         | 140            | 0.204          | 90             | 8              | 0.682            | 0.648         |
| 19         | 140            | 0.204          | 60             | 4              | 0.320            | 0.329         |
| 20         | 140            | 0.204          | 60             | 12             | 0.233            | 0.278         |
| 21         | 140            | 0.136          | 30             | 4              | 0.206            | 0.203         |
| 22         | 140            | 0.136          | 30             | 12             | 0.297            | 0.249         |
| 23         | 140            | 0.136          | 90             | 12             | 0.582            | 0.562         |
| 24         | 140            | 0.136          | 90             | 4              | 0.676            | 0.700         |
| 25         | 140            | 0.136          | 60             | 8              | 0.361            | 0.357         |
| 26         | 140            | 0.136          | 60             | 8              | 0.371            | 0.357         |
| 27         | 140            | 0.136          | 60             | 8              | 0.350            | 0.357         |
